# Supplementary material for: Constrained geometry aminooxazolinate ligands giving chiral zirconium guanidinates; catalytic cyclohydroamination
Source: Royal Society of Chemistry journal article supplement (doi:10.1039/b803831g), 2008-01-01

# **<sup>1</sup>H NMR Spectra**

## **Constrained geometry aminooxazolate ligands giving chiral zirconium guanidates; catalytic cyclohydroamination**

**Andrew L. Gott, Guy J. Clarkson, Robert J. Deeth, Max. L. Hammond, Colin Morton,  
and Peter Scott\***

### Contents

2. <sup>1</sup>H NMR spectrum of **1**
3. <sup>1</sup>H NMR spectrum of **2**
4. <sup>1</sup>H NMR spectrum of **3**

Fig. S1.  $^1\text{H}$  NMR spectrum of **1**

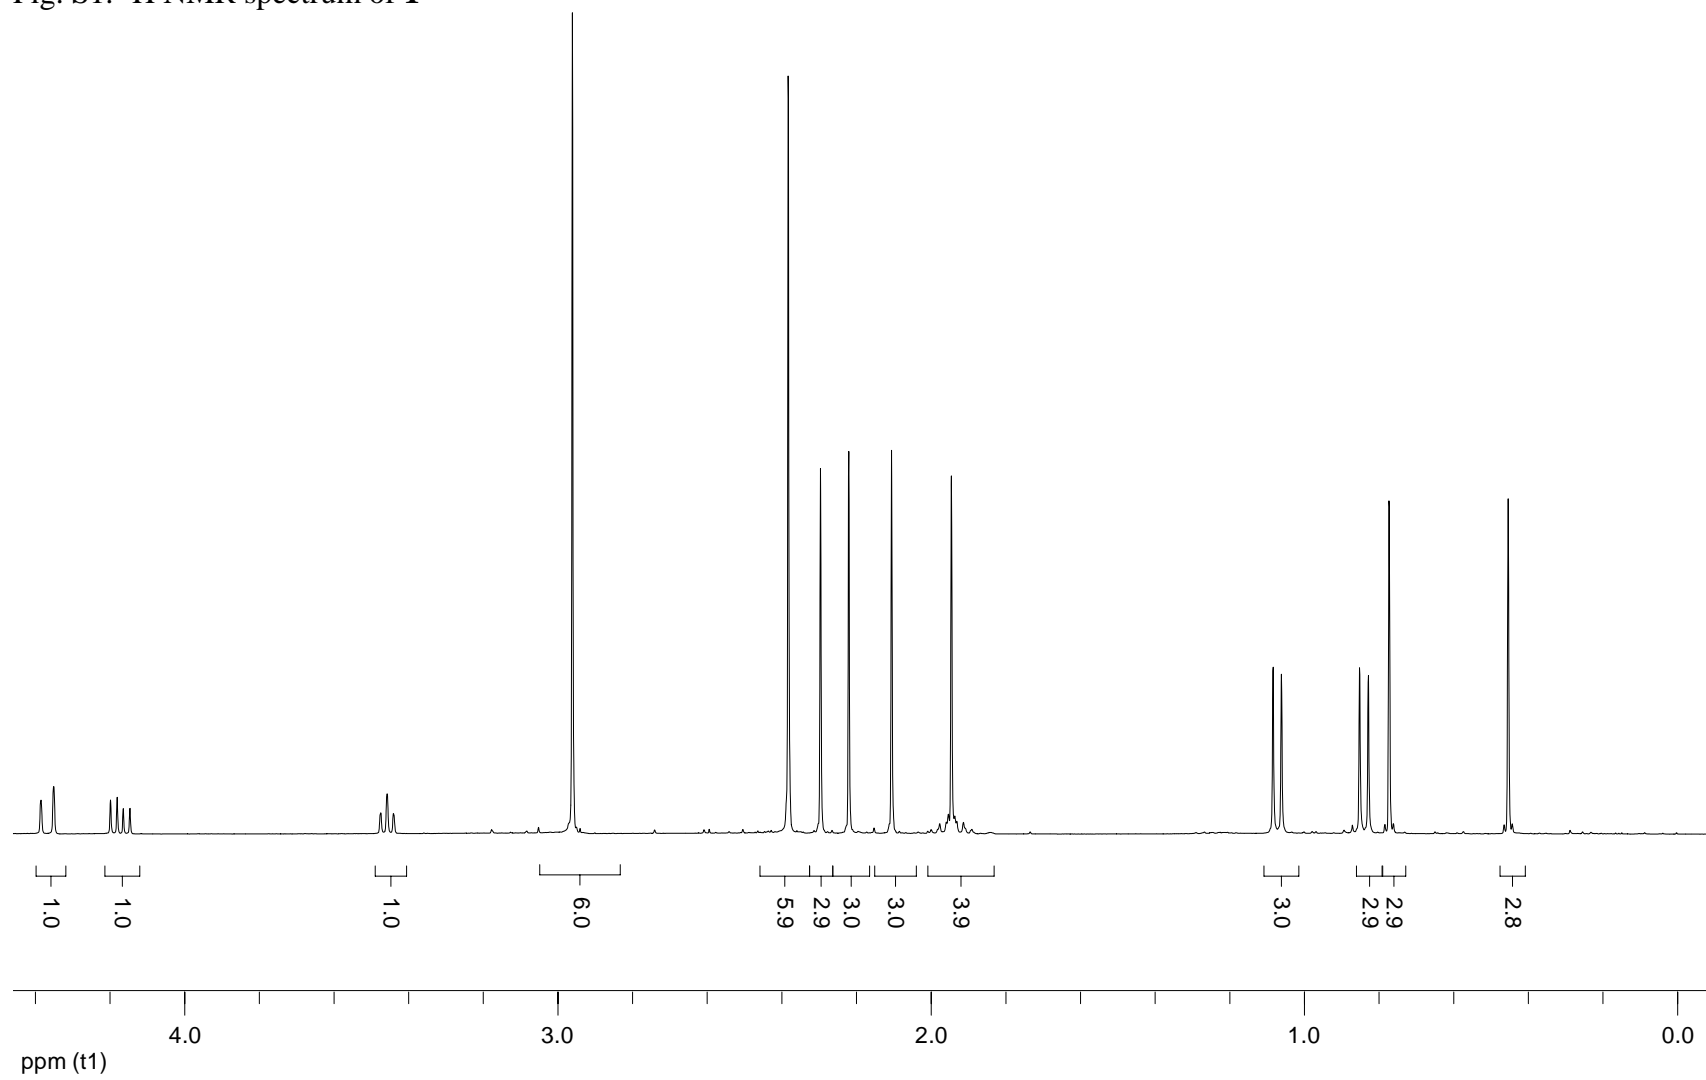

Fig. S2.  $^1\text{H}$  NMR spectrum of **2**

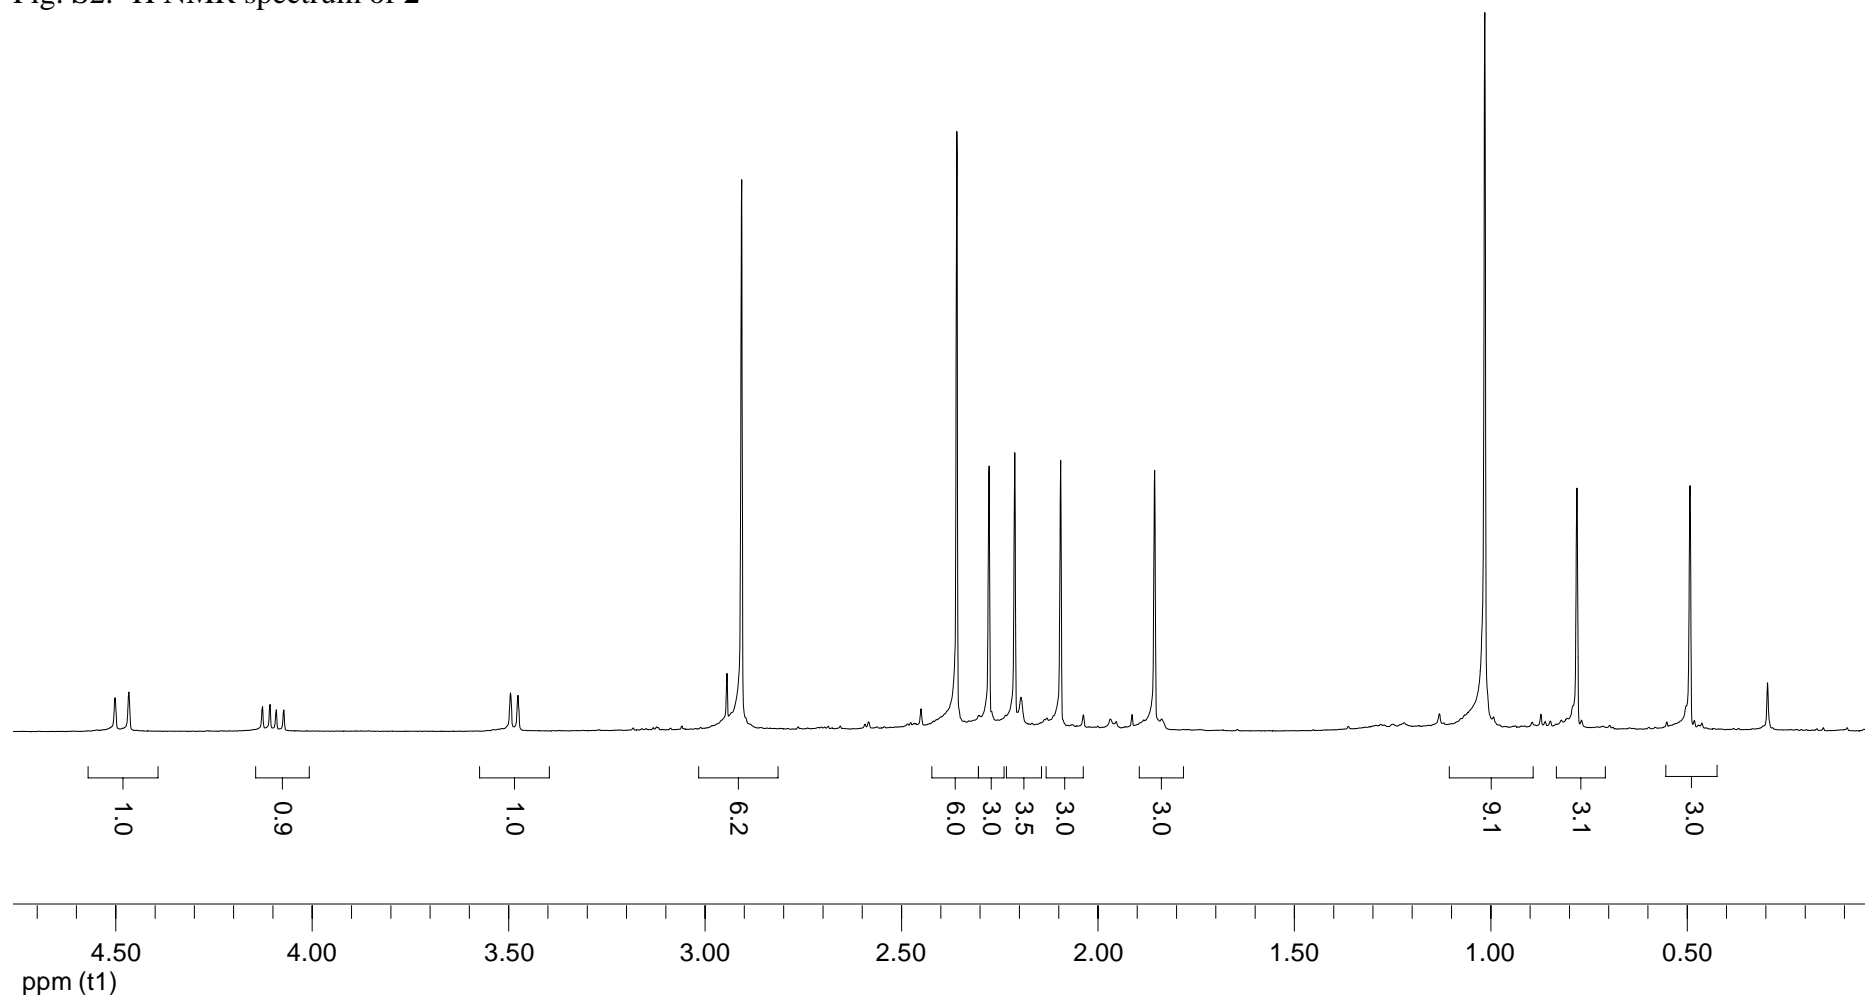

Fig. S3.  $^1\text{H}$  NMR spectrum of diastereomers **3**

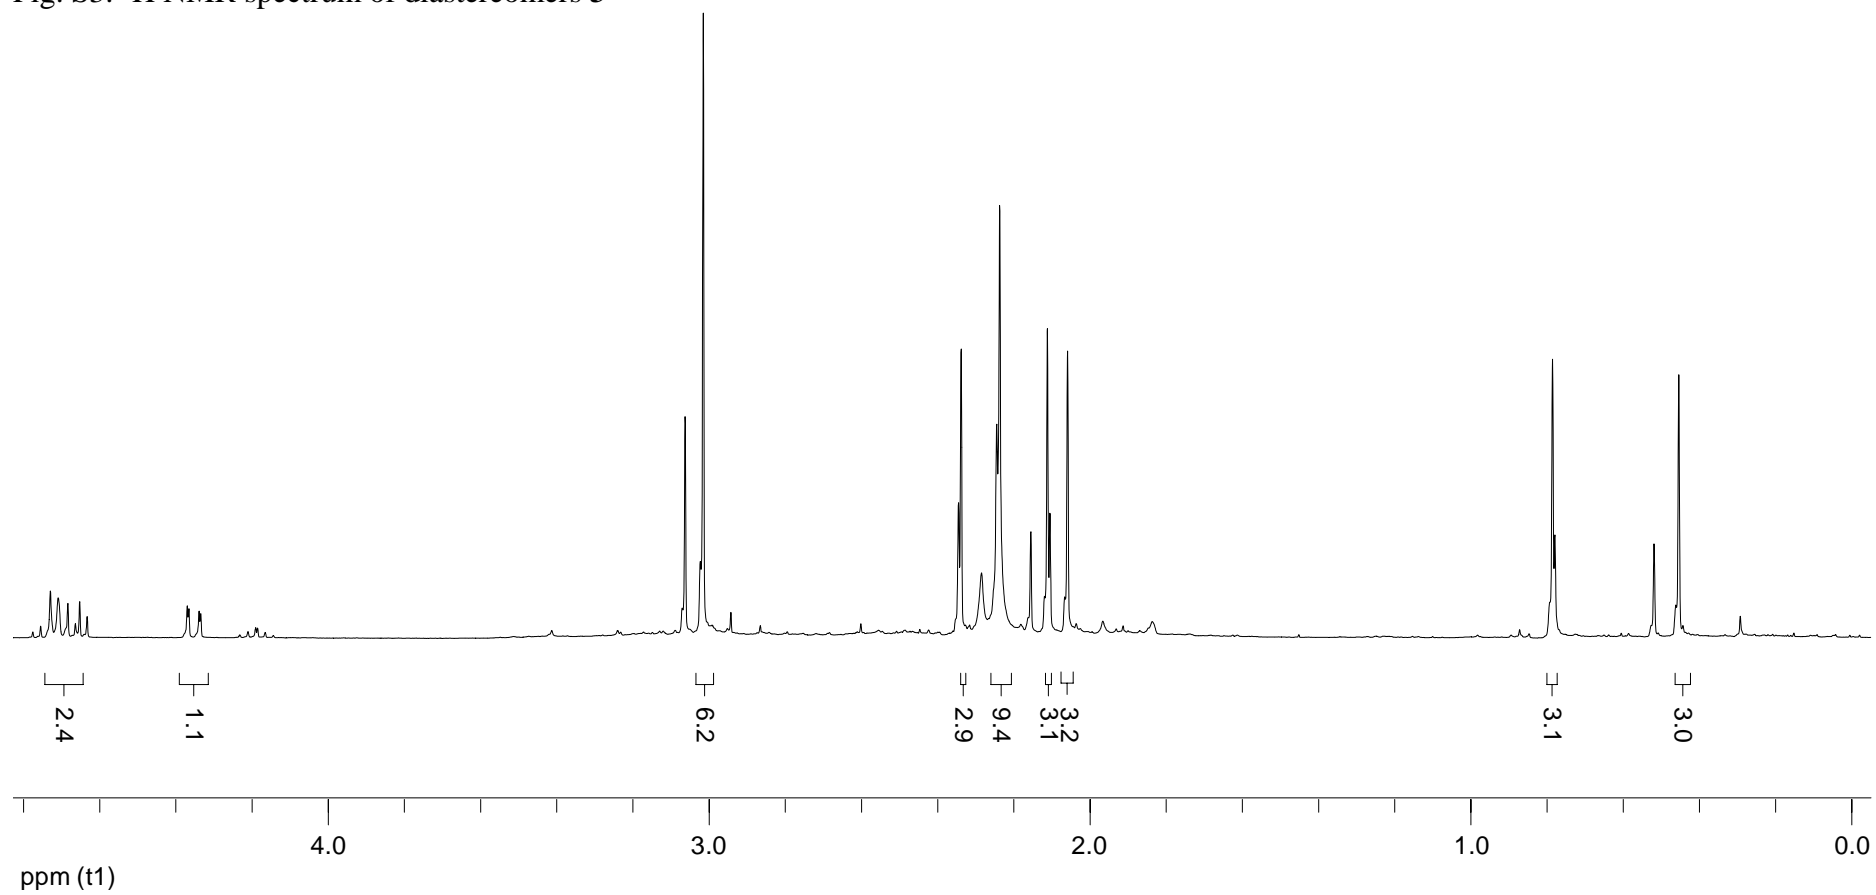

Supplement: b803831g.pdf [file b803831g.pdf]
